# Supplementary material for: Technical Note: Preventing CO 2 overestimation from mercuric or copper (II) chloride preservation of dissolved greenhouse gases in freshwater samples
Source: Copernicus journal article supplement (doi:10.5194/egusphere-2023-1745), 2023-07-31
Supplement: Supplementary file 1 [file egusphere-2023-1745-supplement.pdf]

# Supplementary Information: Preventing CO<sub>2</sub> overestimation from mercuric or copper (II) chloride preservation of dissolved gases in freshwater samples

François Clayer<sup>1\*</sup>, Jan Erik Thrane<sup>1</sup>, Kuria Ndungu<sup>1</sup>, Andrew King<sup>1</sup>, Peter Dörsch<sup>2</sup>, Thomas Rohrlack<sup>2</sup>

<sup>1</sup>Norwegian Institute for Water Research (NIVA), Økernveien 94, 0579 Oslo, Norway

<sup>2</sup>Faculty of Environmental Sciences and Natural Resource Management, Norwegian University of Life Sciences, PO Box 5003, 1432 Ås, Norway

\*Corresponding author(s): François Clayer ([francois.clayer@niva.no](mailto:francois.clayer@niva.no))

This supplementary information includes:

- Tables S1-S3
- Figures S1-S3

**Table S1.** Water chemistry analyses of Lake Svartkulp sample.

| Determinants     | Standard (NIVA method)                                              | Result | Units                 | MU   | LOQ   |
|------------------|---------------------------------------------------------------------|--------|-----------------------|------|-------|
| Alkalinity       | NS-EN ISO 9963-1:1996 (C1-4)                                        | 127    | µmol L <sup>-1</sup>  | 20%  | 30    |
| Ammonium         | NS-EN ISO 10304-1:2009 (anion) NS-EN ISO 14911:1999 (cation) (C4-4) | 3      | µg N L <sup>-1</sup>  | 20%  | 2     |
| Nitrate          | NS-EN ISO 10304-1:2009 (anion) NS-EN ISO 14911:1999 (cation) (C4-4) | 5      | µg N L <sup>-1</sup>  | 20%  | 2     |
| Colour           | NS-EN ISO 7887:2011 (A5-2)                                          | 59     | mg L <sup>-1</sup> Pt | 20%  | 2     |
| Phosphate        | Mod. NS 4724:1984 (D1-3)                                            | 1      | µg P L <sup>-1</sup>  | 30%  | 1     |
| pH               | NS-EN ISO 10523:2012 (A1-5)                                         | 6.73   | pH units              | ±0.2 | 3.5   |
| pH temperature   | NS-EN ISO 10523:2012 (A1-5)                                         | 23.9   | °C                    |      |       |
| TOC              | Mod. NS-EN 1484:1997 (G4-2)                                         | 8.9    | mg C L <sup>-1</sup>  | 20%  | 0.1   |
| Total nitrogen   |                                                                     | 230    | µg N L <sup>-1</sup>  | 20%  | 10    |
| Total phosphorus | Mod. NS 4725:1984 (D2-1)                                            | 9      | µg P L <sup>-1</sup>  | 20%  | 1     |
| Aluminum*        | Mod. NS-EN ISO 17294-1:2007 (E8-4)                                  | 66.6   | µg L <sup>-1</sup>    | 20%  | 0.1   |
| Calcium*         | Mod. NS-EN ISO 17294-1:2007 (E8-4)                                  | 2.34   | mg L <sup>-1</sup>    | 20%  | 0.005 |
| Chloride*        | NS-EN ISO 10304-1:2009 (C4-4)                                       | 1.91   | mg L <sup>-1</sup>    | 20%  | 0.005 |
| Copper*          | Mod. NS-EN ISO 17294-1:2007 (E8-4)                                  | 1.23   | µg L <sup>-1</sup>    | 25%  | 0.04  |
| Iron*            | Mod. NS-EN ISO 17294-1:2007 (E8-4)                                  | 51.6   | µg L <sup>-1</sup>    | 20%  | 0.3   |
| Magnesium*       | NS-EN ISO 14911:1999 (C4-4)                                         | 0.43   | mg L <sup>-1</sup>    | 20%  | 0.002 |
| Manganese*       | Mod. NS-EN ISO 17294-1:2007 (E8-4)                                  | 53.5   | µg L <sup>-1</sup>    | 15%  | 0.03  |
| Nickel*          | Mod. NS-EN ISO 17294-1:2007 (E8-4)                                  | 0.22   | µg L <sup>-1</sup>    | 15%  | 0.04  |
| Potassium*       | NS-EN ISO 14911:1999 (C4-4)                                         | 0.19   | mg L <sup>-1</sup>    | 20%  | 0.003 |
| Sulfate*         | NS-EN ISO 10304-1:2009 (C4-4)                                       | 1.63   | mg L <sup>-1</sup>    | 20%  | 0.005 |
| Zinc*            | Mod. NS-EN ISO 17294-1:2007 (E8-4)                                  | 6.5    | µg L <sup>-1</sup>    | 25%  | 0.15  |

\*determined in water from nearby lake Store Åklungen (60.000; 10.722; 3 km North of Lake Svartkulp, within the same watershed) in August 2020. TOC = total organic carbon, MU = measurement uncertainties, LOQ = limit of quantification

**Table S2.** Effect of time and treatment on dissolved gases (two way anova, with *F* test and *P* value). Bonferroni correction for multiple testing  $\alpha=0.05/5=0.01$ .

|                  | Treatment |                      | Time     |                      | Treatment × Time |                      |
|------------------|-----------|----------------------|----------|----------------------|------------------|----------------------|
|                  | <i>F</i>  | <i>P</i>             | <i>F</i> | <i>P</i>             | <i>F</i>         | <i>P</i>             |
| O <sub>2</sub>   | 204       | <2×10 <sup>-16</sup> | 199      | <2×10 <sup>-16</sup> | 61               | <2×10 <sup>-16</sup> |
| CO <sub>2</sub>  | 215       | <2×10 <sup>-16</sup> | 165      | <2×10 <sup>-16</sup> | 61               | <2×10 <sup>-16</sup> |
| CH <sub>4</sub>  | 121       | <2×10 <sup>-16</sup> | 3.4      | 0.039                | 0.74             | 0.62                 |
| N <sub>2</sub> O | 8.9       | 6×10 <sup>-5</sup>   | 84       | <2×10 <sup>-16</sup> | 6.3              | 4×10 <sup>-5</sup>   |
| N <sub>2</sub>   | 1.5       | 0.22                 | 0.5      | 0.61                 | 0.9              | 0.53                 |

**Table S3.** CO<sub>2</sub> diffusion fluxes ( $F_{\text{CO}_2}$ , mol m<sup>-2</sup> d<sup>-1</sup>) from Lake Lundebyvannet estimated from HgCl<sub>2</sub>-fixed and unfixed samples following Cole and Caraco (1998; CC98), Vachon and Prairie (2013; VP13) and Crusius and Wanningkhof (2003; CW03).

| Preservatives |                   | Apr. | May   | Jun.   | Jul.  | Aug.  | Sep.  | Oct. | Nov. | Ice-free season |
|---------------|-------------------|------|-------|--------|-------|-------|-------|------|------|-----------------|
| CC98          | HgCl <sub>2</sub> | 0.10 | 0.07  | 0.01   | 0.15  | 0.11  | 0.23  | 0.37 | 0.48 | 0.17            |
|               | None              | 0.20 | 0.21  | 0.16   | 0.34  | 0.29  | 0.47  | 0.57 | 0.77 | 0.35            |
|               | Diff (%)          | 97 % | 188 % | 2163 % | 130 % | 162 % | 99 %  | 55 % | 62 % | 108 %           |
| VP13          | HgCl <sub>2</sub> | 0.15 | 0.11  | 0.01   | 0.22  | 0.16  | 0.35  | 0.52 | 0.71 | 0.24            |
|               | None              | 0.30 | 0.32  | 0.24   | 0.50  | 0.42  | 0.69  | 0.80 | 1.14 | 0.51            |
|               | Diff (%)          | 97 % | 186 % | 2101 % | 130 % | 164 % | 99 %  | 56 % | 62 % | 109 %           |
| CW03          | HgCl <sub>2</sub> | 0.02 | 0.01  | 0.00   | 0.02  | 0.01  | 0.04  | 0.02 | 0.09 | 0.02            |
|               | None              | 0.03 | 0.03  | 0.02   | 0.04  | 0.02  | 0.07  | 0.04 | 0.15 | 0.04            |
|               | Diff (%)          | 88 % | 178 % | 1783 % | 136 % | 163 % | 103 % | 59 % | 63 % | 112 %           |

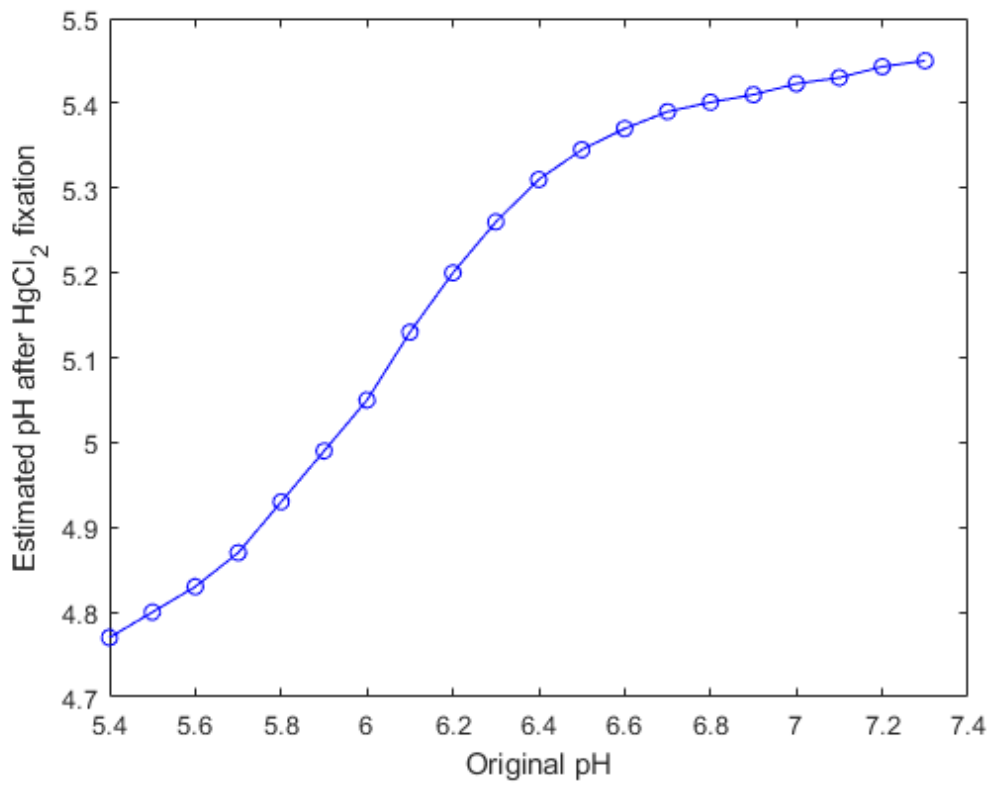

**Fig S1.** Comparison of in-situ and PHREEQC-estimated pH after HgCl<sub>2</sub> fixation in Lake Lundebyvannet samples.

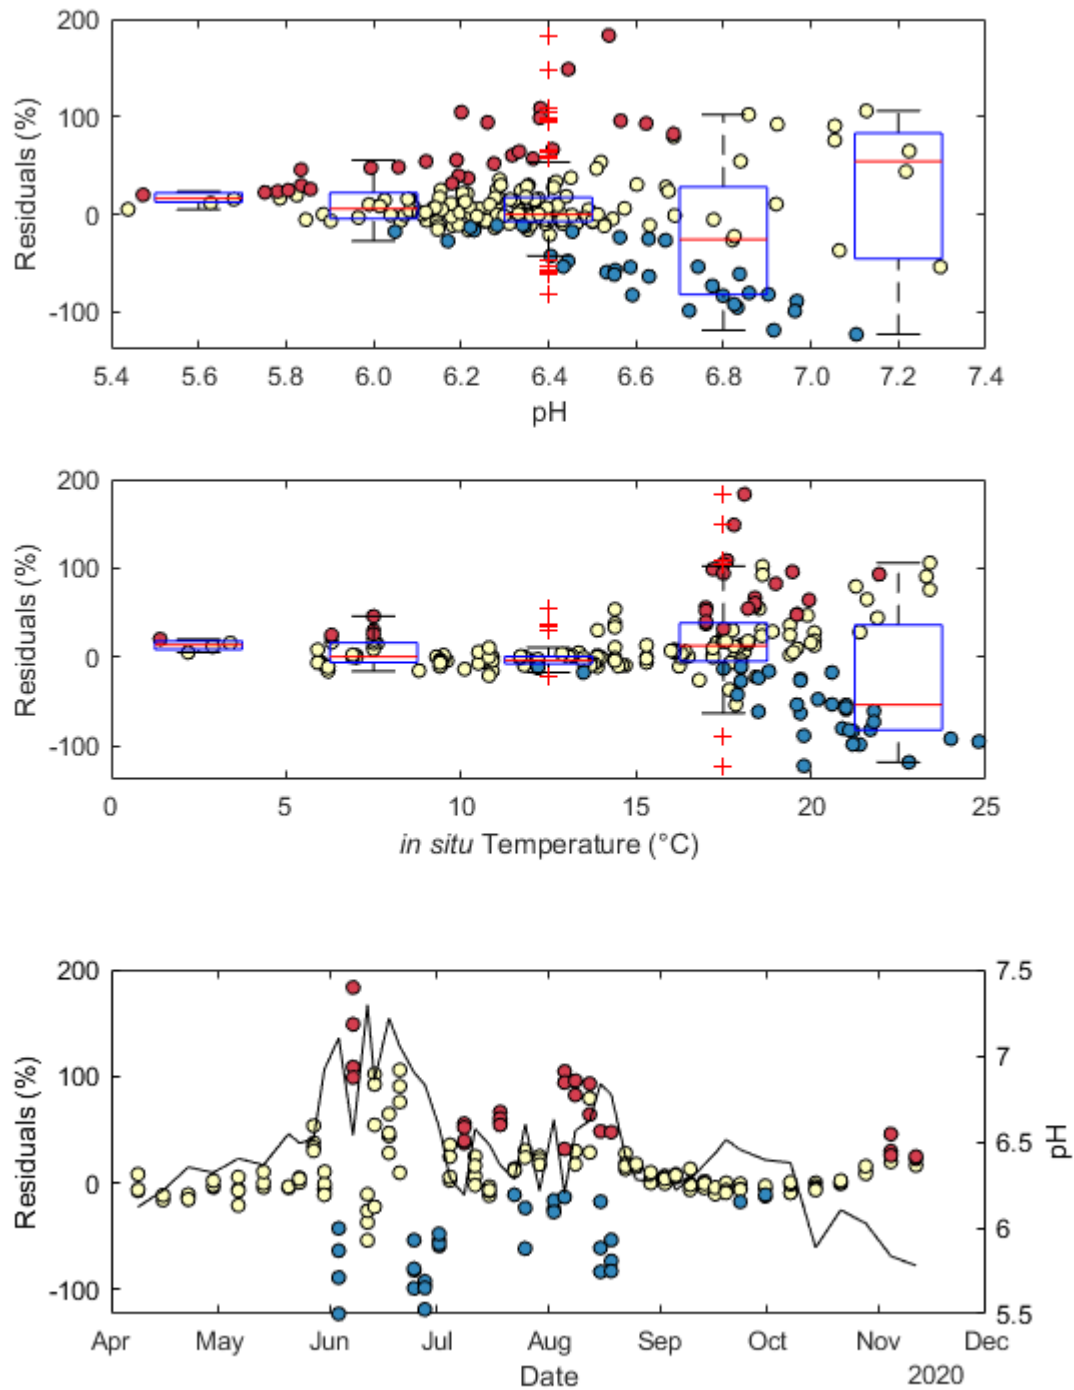

**Fig S2.**  $E$  model residuals as a function of pH (top), *in situ* water temperature (middle) and date (bottom) in Lake Lundebyvannet. Residuals are determined by the difference between  $E$  predicted with Eq. 11 and empirically determined  $E$  with Eq. 7. Timeseries of pH is also shown in the bottom panel. For each 0.4 pH unit bin and 5°C temperature bin, a box plot was drawn. Blue and red symbols are samples for which values of  $[HCO_3^-]_i - [CO_2]_{ex}$  were larger than (or equal to) 20  $\mu\text{M}$  and smaller than (or equal to) -20  $\mu\text{M}$ , respectively.

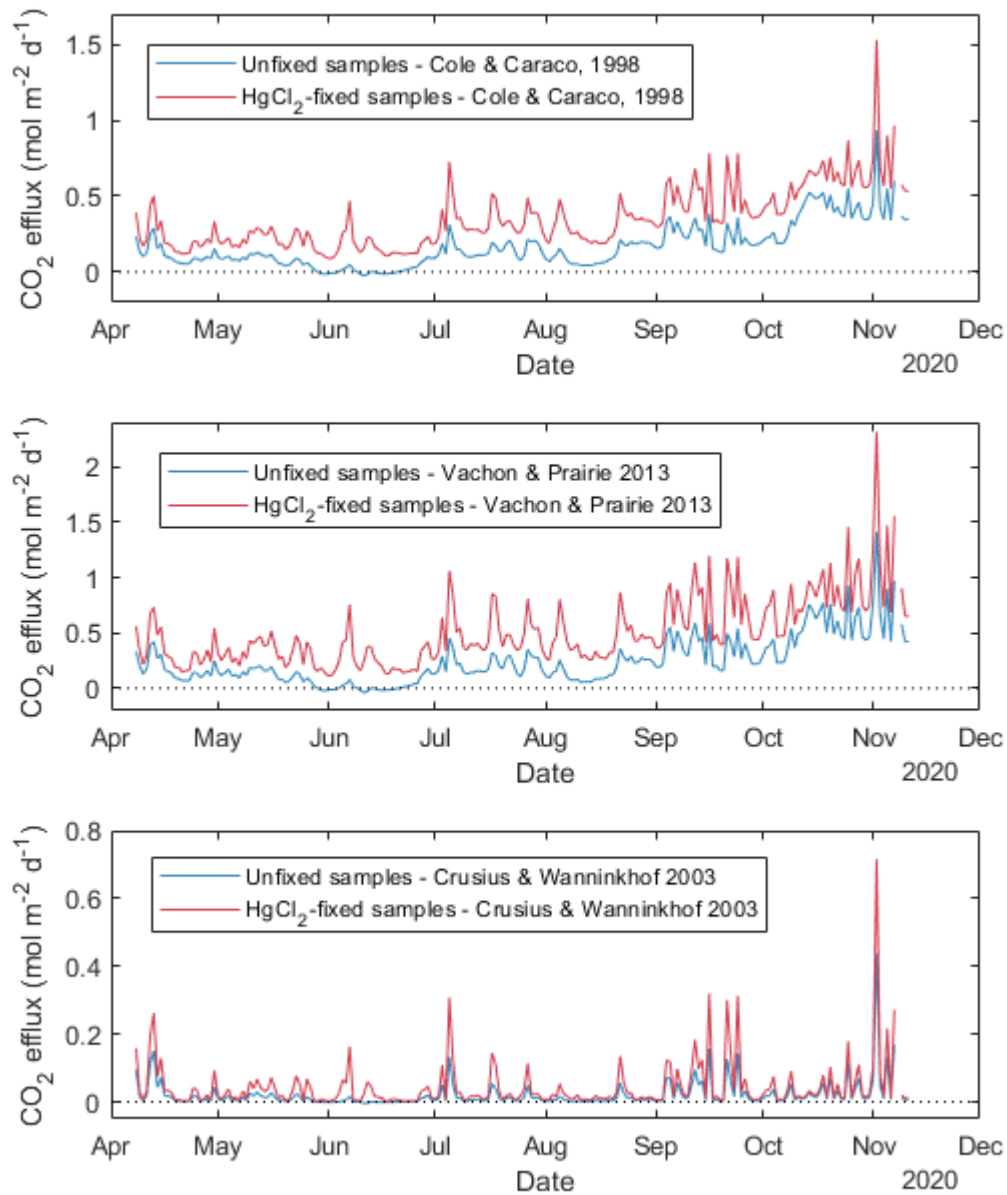

**Fig S3.** Daily and monthly diffusion fluxes at the water-atmosphere interface from Lake Lundebyvannet. Diffusion fluxes were calculated following Cole & Caraco (1998; top panel), Vachon and Prairie (2013; middle panel) and Crusius and Wanninkhof (2003; bottom panel).
